# Supplementary material for: Recommendations to plan a national burden of disease study
Source: PubMed Central journal article supplement (PMC8262070; doi:10.1186/s13690-021-00652-x), 2021-07-07
Supplement: 13690_2021_652_MOESM1_ESM.pdf [file 13690_2021_652_MOESM1_ESM.pdf]

1 **Additional file 1: Summary of Survey results**

2 We performed a survey among European countries to identify the current needs for BoD studies  
3 to integrate into routine public health activities in May 2019. This survey addressed following  
4 aspects: BoD support required (i.e., for methodology, practical exercises with test data,  
5 interpretation of BoD data, and translation of BoD indicators into health policy), availability  
6 and accessibility of different data sources, existing workforce and governance of BoD studies  
7 (see annex 1.1).

8 The survey invitation was sent to 27 EU/EEA countries and the response rate was 93% (25/27).

9 Among 25 countries, 72% mentioned that they have not carried out any BoD study in the past  
10 and have no experience to develop a case study for BoD. These countries mentioned that they  
11 are required the support for BoD methodology (i.e., 19 countries), practical exercises to  
12 estimate the BoD indicators (i.e., 17 countries), interpretation of BoD data (i.e., 19 countries)  
13 and translation of BoD data into policy (i.e., 14 countries). Data from different sources (i.e.,  
14 electronic health records, disease registries, health surveys and vital statistics) are available in  
15 all responded countries. Among 25 countries, almost 80% have access to the data at national  
16 level, 72% at subnational level and only 20% can access at metropolitan level. The majority of  
17 the countries have necessary workforce to conduct a BoD study including public health experts,  
18 epidemiologists and statisticians. Very few have the health economists and demographers. For  
19 the governance of BoD studies, 80% of responded countries mentioned that public health  
20 institutes should have the governance to perform the BoD studies.

21

22

23

| A. Background information                                                                                                         | Responses                                                                                                                                     |
|-----------------------------------------------------------------------------------------------------------------------------------|-----------------------------------------------------------------------------------------------------------------------------------------------|
| Name                                                                                                                              |                                                                                                                                               |
| Country                                                                                                                           |                                                                                                                                               |
| Institution                                                                                                                       |                                                                                                                                               |
| Responsible for:                                                                                                                  |                                                                                                                                               |
| Have you carried out any previous BoD work?                                                                                       | <input type="checkbox"/> Yes <input type="checkbox"/> No                                                                                      |
| If yes:                                                                                                                           |                                                                                                                                               |
| i. Could you develop a case study?                                                                                                | <input type="checkbox"/> Yes <input type="checkbox"/> No                                                                                      |
| ii. Do you use, or have you used IHME GBD data?                                                                                   | <input type="checkbox"/> Yes <input type="checkbox"/> No                                                                                      |
| <b>B. BoD support required for:</b>                                                                                               |                                                                                                                                               |
| Please indicate:                                                                                                                  |                                                                                                                                               |
| i. Methodology (i.e., method choice, estimation of BoD estimates, etc.)                                                           | <input type="checkbox"/>                                                                                                                      |
| ii. Practical exercises with test data                                                                                            | <input type="checkbox"/>                                                                                                                      |
| iii. Interpretation of BoD data                                                                                                   | <input type="checkbox"/>                                                                                                                      |
| iv. Communication of BoD data for policy and planning purposes                                                                    | <input type="checkbox"/>                                                                                                                      |
| v. Others, please specify:                                                                                                        | <input type="checkbox"/> _____                                                                                                                |
| <b>C. Data environment</b>                                                                                                        |                                                                                                                                               |
| Is data from different sources (i.e., disease registries, surveys, electronic health records, vital statistics, etc.) accessible? | <input type="checkbox"/> Yes <input type="checkbox"/> No<br>Please comment to provide some additional information (if necessary): _____       |
| Please indicate the level of data coverage:                                                                                       | <input type="checkbox"/> At National level<br><input type="checkbox"/> At Subnational level<br><input type="checkbox"/> At Metropolitan level |
| <b>D. Existing capacity</b>                                                                                                       |                                                                                                                                               |

|                                                                                                                                              |                                                                                                                                                                                                                                                                                        |
|----------------------------------------------------------------------------------------------------------------------------------------------|----------------------------------------------------------------------------------------------------------------------------------------------------------------------------------------------------------------------------------------------------------------------------------------|
| Please indicate the available workforce:                                                                                                     | <input type="checkbox"/> Epidemiologist<br><input type="checkbox"/> Public health expert<br><input type="checkbox"/> Data scientist<br><input type="checkbox"/> Statistician<br><input type="checkbox"/> Programme developer<br><input type="checkbox"/> Others, please specify: _____ |
| Please indicate the required workforce:                                                                                                      | <input type="checkbox"/> Epidemiologist<br><input type="checkbox"/> Public health expert<br><input type="checkbox"/> Data scientist<br><input type="checkbox"/> Statistician<br><input type="checkbox"/> Programme developer<br><input type="checkbox"/> Others, please specify: _____ |
| <b>E. BoD toolkit</b>                                                                                                                        |                                                                                                                                                                                                                                                                                        |
| Please provide short description of the nature of toolkit, whether it should be about estimation methods or guidelines or case studies, etc. |                                                                                                                                                                                                                                                                                        |
| <b>F. Governance</b>                                                                                                                         |                                                                                                                                                                                                                                                                                        |
| Please indicate the institution responsible for performing BoD studies (if already in place) or who would be responsible:                    | <input type="checkbox"/> Public health institutes<br><input type="checkbox"/> Research institutes<br><input type="checkbox"/> Academia<br><input type="checkbox"/> Government<br><input type="checkbox"/> Others, please specify: _____                                                |

25

26

27

28

29

30

31

32
